# Supplementary material for: Mapping of Adenovirus of serotype 3 fibre interaction to desmoglein 2 revealed a novel ‘non-classical’ mechanism of viral receptor engagement
Source: PubMed Central journal article supplement (PMC5976663; doi:10.1038/s41598-018-26871-x), 2018-05-30
Supplement: 41598_2018_26871_MOESM1_ESM.pdf [file 41598_2018_26871_MOESM1_ESM.pdf]

## Supplementary data

**Mapping of Adenovirus of serotype 3 fibre interaction to desmoglein 2 revealed a novel ‘non-classical’ mechanism of viral receptor engagement.**

Emilie Vassal-Stermann<sup>1</sup> ; Manon Mottet<sup>1</sup> ; Corinne Ducournau<sup>1,2</sup> ; Frédéric Iseni<sup>2</sup> ; Charles Vragniau<sup>1</sup> ; Hongjie Wang<sup>3</sup>, Chloe Zubieta<sup>4</sup> ; André Lieber<sup>3\*</sup> and Pascal Fender<sup>1\*</sup>

## Supplementary Figure S1

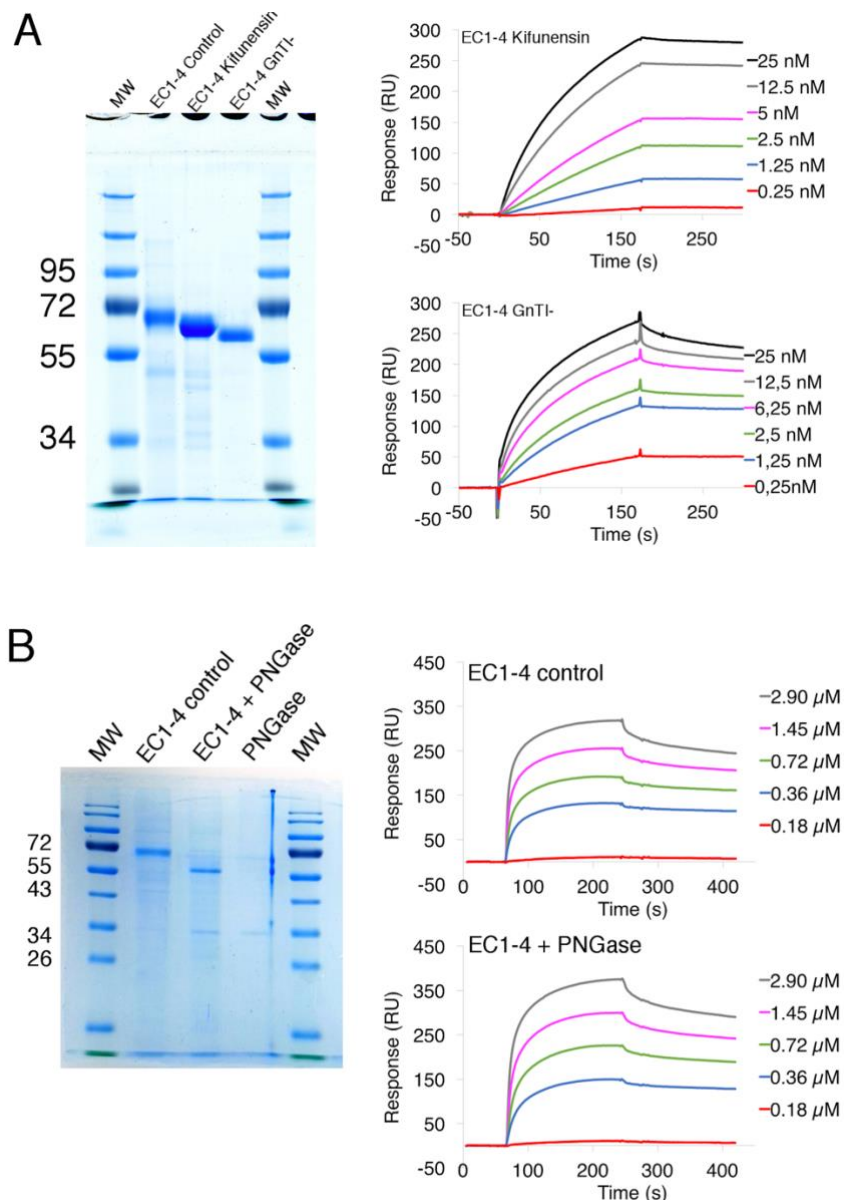

**Legend to Supplementary Figure S1: De-glycosylation studies.** (A) Full-length gel corresponding to the cropped image presented in Fig. 1B. EC1-4 protein expressed in 293F cell line with or without  $10 \mu\text{g}\cdot\text{mL}^{-1}$  of Kifunensin and EC1-4 protein expressed in 293 'GnTI-' cell line (Glycosyl N-Transferase negative: ATCC CRL-3022) were run on SDS-PAGE. A shift in migration is observed when EC1-4 glycosylation is controlled. Surface plasmon resonance (SPR) analysis with those proteins immobilized into the sensorchip shows that Pt-Dd (HAD3 dodecahedron with 12 fibres) binding is not affected by the glycosylation modifications (B) Further de-glycosylation of EC1-4 expressed in 293F cell line was performed with the Peptide N-Glycosidase F (PNGaseF; Sigma-Aldrich) cleaving the whole glycan pattern from the asparagine residues. SDS-PAGE shows the shift in migration of the de-glycosylated EC1-4. SPR experiment performed with immobilized EC1-4 either glycosylated (upper sensorgrams) or deglycosylated (lower sensorgrams) demonstrates that Ad3K binding is not affected by the glycosylation removal from EC1-4.

## Supplementary Figure S2

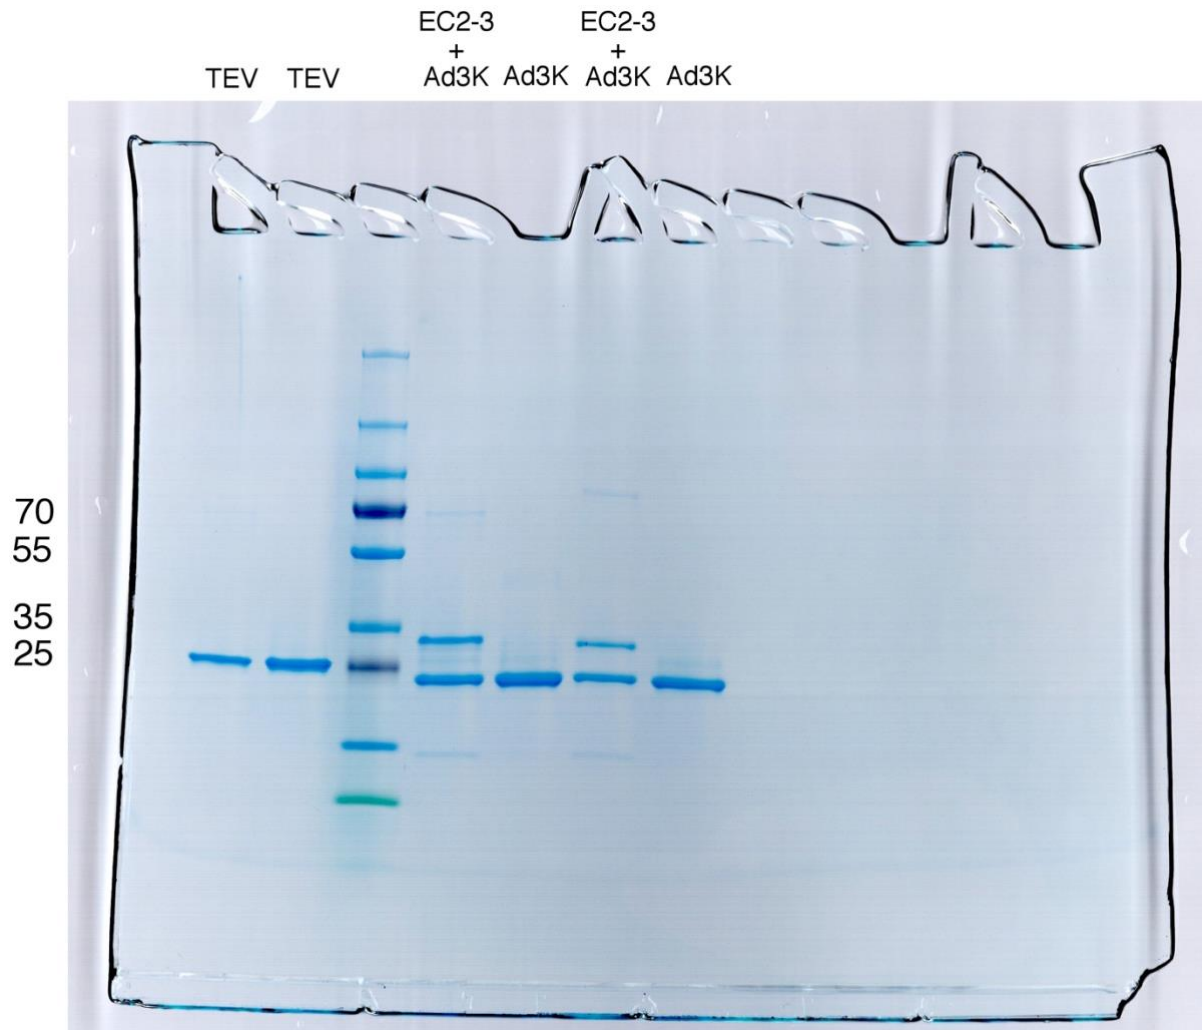

**Legend to Supplemenatry Figure S2 :** Full-length gel corresponding to the cropped image presented in Fig. 5A inset. Lanes 1 and 2 : TEV protease 1 and 2 $\mu$ g, respectively ; Lane 3 : MW Standard ; Lane 4 and 6 : EC2-3 + Ad3K complex after MBP removal (2 $\mu$ g and 1 $\mu$ g, respectively) ; Lanes 5 and 7 : Ad3K alone (2 and 1 $\mu$ g respectively).
